# Supplementary material for: Type I Interferon Induced Epigenetic Regulation of Macrophages Suppresses Innate and Adaptive Immunity in Acute Respiratory Viral Infection
Source: PubMed Central journal article supplement (PMC4692439; doi:10.1371/journal.ppat.1005338), 2015-12-28
Supplement: ppat.1005338.s001.pdf [file ppat.1005338.s001.pdf]

## S1 Table. Genotyping primers and PCR conditions

### Gene Trap Mice

| Primer         | Sequence                    |
|----------------|-----------------------------|
| KOMP universal | CACAACGGGTTCTTCTGTTAGTCC    |
| Gene Trap      | GAATCAAGACTAGAAAGGCGACTACTG |

### Floxed Mice

| Primer                     | Sequence                    |
|----------------------------|-----------------------------|
| <i>Setdb2</i> 3' universal | CACAACGGGTTCTTCTGTTAGTCC    |
| <i>Setdb2</i> wild-type    | GAATCAAGACTAGAAAGGCGACTACTG |
| KOMP allele                | TCTATAGTCGCAGTAGGCGG        |

### PCR conditions

| Cycles | Temperature | Time   |
|--------|-------------|--------|
| 1      | 95°C        | 2 min  |
| 25     | 95°C        | 30 sec |
|        | 57°C        | 40 sec |
|        | 72°C        | 3 min  |
| 1      | 72°C        | 7 min  |

### PCR products

| Primers                                | Product       |
|----------------------------------------|---------------|
| <i>Setdb2</i> 3' universal + wild-type | 250 basepairs |
| <i>Setdb2</i> 3' universal + KOMP      | 900 basepairs |
