# Supplementary material for: Type I Interferon Induced Epigenetic Regulation of Macrophages Suppresses Innate and Adaptive Immunity in Acute Respiratory Viral Infection
Source: PubMed Central journal article supplement (PMC4692439; doi:10.1371/journal.ppat.1005338), 2015-12-28
Supplement: ppat.1005338.s002.pdf [file ppat.1005338.s002.pdf]

**S2 Table. Custom ChIP primers**

| <b>Promotor</b> | <b>Sequence</b>                                  |
|-----------------|--------------------------------------------------|
| Isg15           | F: CTGCCGCCCGCCCTCTCC<br>R: CCCCGCCCGCCCACTCTA   |
| Mx1             | F: TGGGCACAGACAACCTTA<br>R:TCCTCAGAGCCCTTAGACT   |
| Ccl2            | F: CAACAAGGCCTGATAACCA<br>R: GGAAAGGACCCCCAGTAAG |

| <b>Setdb2 Promoter</b> | <b>Sequence</b>                                            |
|------------------------|------------------------------------------------------------|
| STAT1 binding site 1   | F: TTTGAAACTGGGGTAAGGGTGTG<br>R: ATAAAAAGGAGAAACGGGAAGTAA  |
| STAT1 binding site 2   | F: AGTCGCGTTTCCCCACCGTCTTG<br>R: TCTTGTCTGTGCTCCGCTGTCTAC  |
| IRF7 binding site 1    | F: CTCAATTTTCACATGCTCTAACCT<br>R: ACAGTCTAAATTCCTCCTTGCTAT |
| IRF7 binding site 2    | F: TTTGAAACTGGGGTAAGGGTGTG<br>R: ATAAAAAGGAGAAACGGGAAGTAA  |
